# Supplementary material
Source: publisher figshare collection journal article supplement (https://acs.figshare.com/ndownloader/files/4538098)
Supplement: Supplementary file 1 [file 4538098]

**Measuring Densities of Solids and Liquids Using Magnetic Levitation:  
Fundamentals**

**SUPPORTING INFORMATION**

Katherine A. Mirica, Sergey S. Shevkoplyas, Scott T. Phillips, Malancha Gupta,  
and George M. Whitesides\*

Department of Chemistry & Chemical Biology, Harvard University, Cambridge, MA 02138

\* Corresponding author E-mail: [gwhitesides@gmwgroup.harvard.edu](mailto:gwhitesides@gmwgroup.harvard.edu)

## General Methods

The NdFeB magnets (5 cm × 5 cm × 2.5 cm) were purchased from K&J Magnetics ([www.kjmagnetics.com](http://www.kjmagnetics.com)) and aligned on top of one another 4.5 cm apart within aluminum blocks. Similar magnets can also be obtained from Applied Magnets, [www.magnet4less.com](http://www.magnet4less.com) at a lower price. The strength of the magnetic field within the device was measured using a hand-held DC magnetometer (AlphaLab Inc, [www.trifield.com](http://www.trifield.com)). Calibrated density standards ( $\pm 0.0002 \text{ g/cm}^3$  at 23°C) were purchased from American Density Materials (Stauton, VA; [www.densitymaterials.com](http://www.densitymaterials.com)). Spherical polymer samples were purchased from McMaster-Carr ([www.mcmaster.com](http://www.mcmaster.com)). Polystyrene microspheres with precisely defined radii were supplied by Duke Scientific Corporation ([www.dukescientific.com](http://www.dukescientific.com)), Polysciences, Inc. ([www.polysciences.com](http://www.polysciences.com)), and Spherotech ([www.spherotech.com](http://www.spherotech.com)). All other samples and reagents were purchased from Sigma Aldrich (Atlanta, GA) and used without further purification. “Levitation height” of samples was measured using a ruler with millimeter-scaled marking. Helium pycnometry measurements were performed by Quantachrome Instruments for a fee on an Ultrapyc 1200e instrument.

**Figure S0.** A plot generated using numerical simulation using COMSOL Multiphysics showing the dependence of the  $z$ -component of the magnetic field  $B_z$  on the separation between magnets ( $d$ ) for  $d = 25, 35, 45, 55, 65, 75$  mm along the centerline between the two magnets.

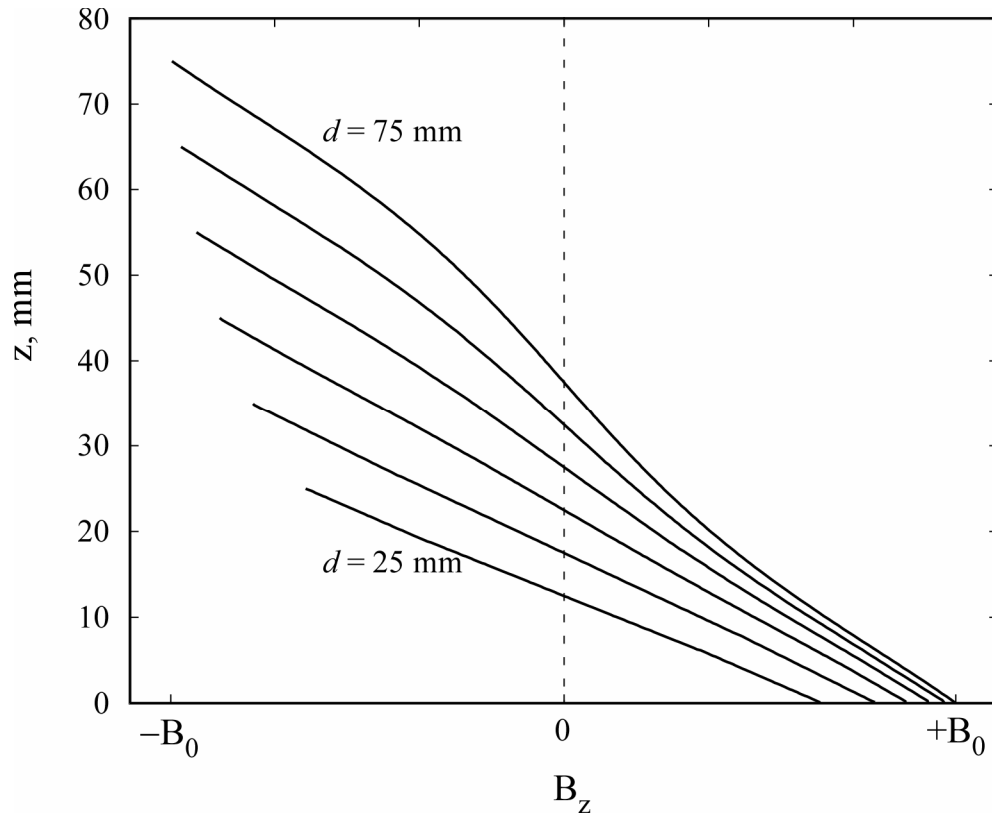

**Figure S1.** Photographs demonstrating levitation of a glass bead (density =  $1.1500 \pm 0.0002$  g/cm<sup>3</sup>) in different aqueous paramagnetic solutions (1M MnCl<sub>2</sub>, 1M MnBr<sub>2</sub>, 1M CuSO<sub>4</sub>, 1M GdCl<sub>3</sub>, 1M FeCl<sub>2</sub>).

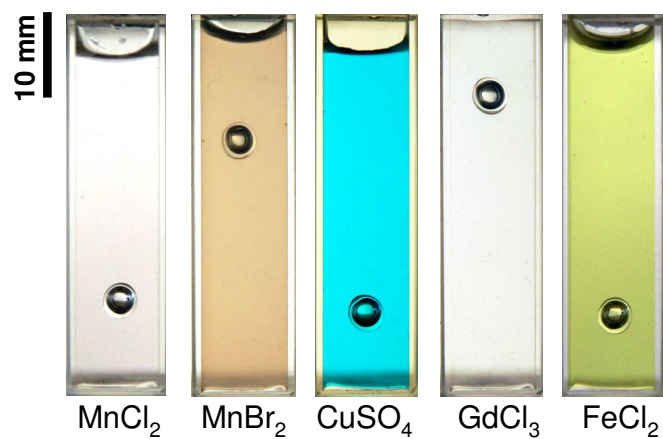

**Figure S2.** Net Volumetric Magnetic Susceptibilities of Common Diamagnetic Substances<sup>1-7</sup>

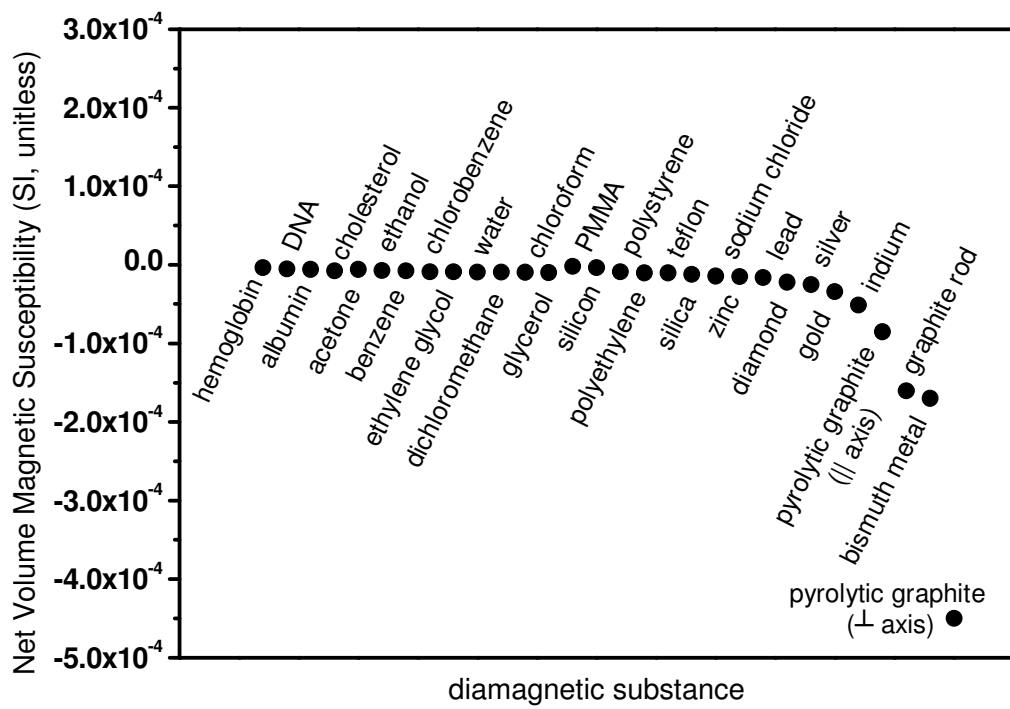

**Figure S3.** Deliberate misalignment of the container with the centerline between the magnets (red dotted line). Beads of different densities (from top to bottom: 1.0500, 1.0800, 1.1000, 1.1200, 1.1500 g/cm<sup>3</sup>) levitating in 1M MnCl<sub>2</sub> align with the centerline between the magnets regardless of the position of the container, as long as the centerline is accessible within the container (A and B). Inability of the beads to align with the centerline (C and D) does not result in significant change in the levitation height of the beads. Scale bar represents 10 mm.

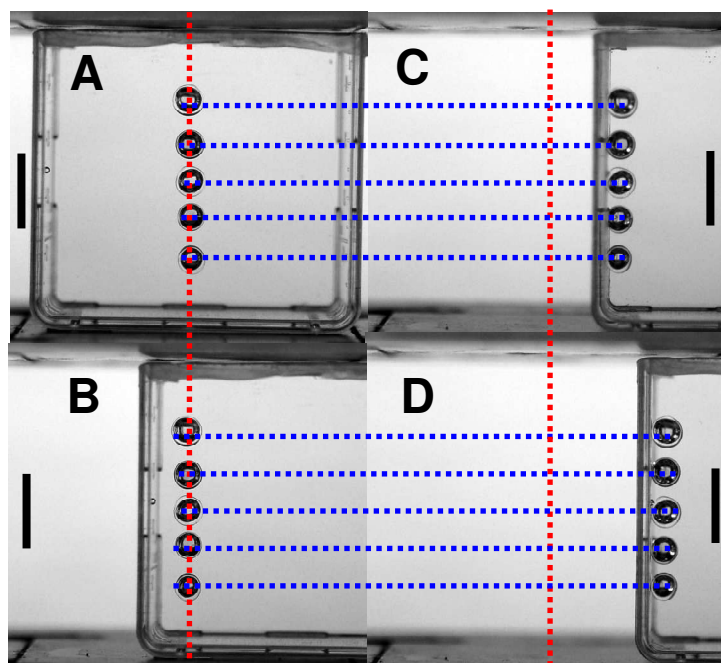

**Figure S4.** Effect of tilting the experimental set-up on height at which the objects levitate. A) Photographs of beads of different density (from top to bottom: 1.0500, 1.0800, 1.1000, 1.1200, 1.1500 g/cm<sup>3</sup>) levitating in 1 M MnCl<sub>2</sub> at different values of tilt angle  $\theta$ . The dimensions of the container in which the beads levitate are 50 mm  $\times$  30 mm  $\times$  45 mm. The container spans the entire width and height of the magnets and is centered lengthwise between the magnets. B) Images in shown in panel A rotated by angle  $\theta$  to emphasize the effect of tilting on the levitation height of the beads.

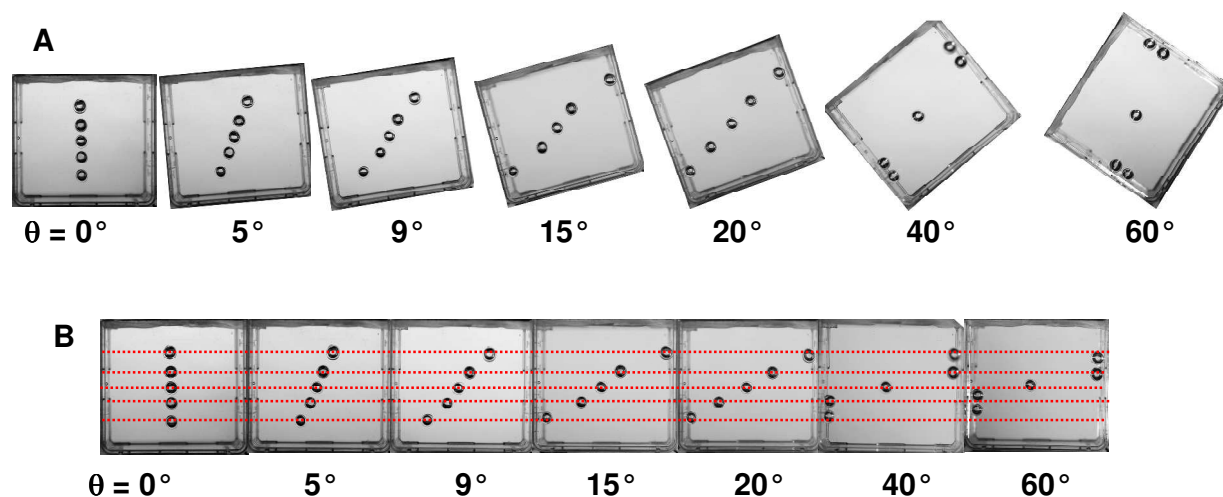

**Figure S5.** Photographs of polystyrene spheres of different radii levitating at  $t_0$  in aqueous 500 mM  $\text{MnCl}_2$ . Spheres of  $R > \sim 7 \mu\text{m}$  form well defined clusters at  $h$ , spheres of  $\sim 2 \mu\text{m} < R < \sim 7 \mu\text{m}$  form diffuse clouds centered around  $h$ , while spheres of  $R < \sim 2 \mu\text{m}$  remain essentially uniformly dispersed throughout the solution.

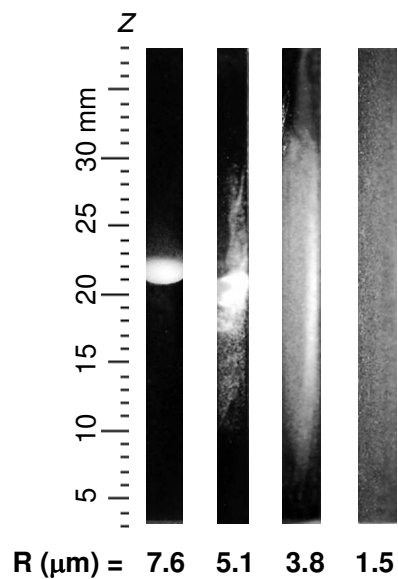



## Sources and Magnitude of Errors for Calculating Densities of Objects Using Eqn (8)

### *Experimental parameters and constants: $B_0$ , $d$ , $g$ , $c$ , and $T$*

We measured the magnitude of the magnetic field at the center on the surface of the bottom magnet with a magnetometer and found that in the configuration shown in **Fig. 1a**  $B_0$  was  $(0.375 \pm 0.003)$  Tesla.

The distance between the two magnets,  $d$ , remained constant in our experiments and was equal to  $(45 \pm 0.5)$  mm.

The acceleration due to gravity,  $g$ , at the surface of the Earth ranges from  $9.78 - 9.82$   $\text{m/s}^2$ , where the exact value depends on the latitude and other factors; we used the average value of  $9.80 \text{ m/s}^2$  in our calculations and neglected this variation in our error analysis. The typical variation in  $g$  does not constitute a significant source of uncertainty in calculation of density using eqn 8.

We measured  $T$  using a thermometer with an accuracy of  $\pm 1$  °C.

We did not measure  $c$  directly—instead, we calculated it (eqn. S0A) based on the mass of the salt  $m$  (g) measured using an analytical balance with accuracy of  $\delta m = 0.1 \times 10^{-3}$  g (as specified by the manufacturer of the analytical balance), the total volume of solution  $V$  (L) measured using a volumetric flask with accuracy of  $\delta V = 0.08 \times 10^{-3}$  L (as specified by the manufacturer of the volumetric glassware), and the molecular weight of the salt  $M$  (g/mol) as provided by the vendor. We estimated the error associated with our calculation of concentration,  $\delta c$ , using eqn (S0B),<sup>8</sup> and found it to be less than  $\pm 0.002$  M for the range of concentrations we used in this study.

$$c = \frac{m}{MV} \quad (\text{S0A})$$

$$\delta c = \sqrt{\left(\frac{1}{MV} \delta m\right)^2 + \left(-\frac{m}{MV^2} \delta V\right)^2} \quad (\text{S0B})$$

### ***Magnetic Susceptibility of the Medium, $\chi_m$***

The magnetic susceptibility of the suspending medium,  $\chi_m$ , depends on concentrations and magnetic properties of all the species present in solution. We calculated  $\chi_m$  using eqn (S1), in which  $\chi_p$  is the molar magnetic susceptibility of the paramagnetic salt ( $\text{m}^3/\text{mol}$ , units of SI),  $c$  is the concentration of the paramagnetic salt ( $\text{mol/L}$ ), and  $-9 \times 10^{-6}$  is the bulk magnetic susceptibility of water.<sup>9,10</sup> The dependence of the molar magnetic susceptibilities of the paramagnetic salt  $\chi_p$  on temperature follows the Curie-Weiss law given by eqn (S2), where  $T$  is the temperature of the medium (expressed in  $^\circ\text{K}$ ),  $C_{CW}$  is the Curie constant ( $\text{m}^3 \text{K} / \text{mol}$ ) and  $\theta$  is the Weiss constant ( $^\circ\text{K}$ ) of the paramagnetic salt.<sup>10</sup> The dependence of magnetic susceptibility of the medium on temperature is then given by eqn (S3), in which we assumed that the magnetic properties of water do not change significantly with temperature.<sup>1,2</sup>

$$\chi_m = \chi_p c - 9 \times 10^{-6} \quad (\text{S1})$$

$$\chi_p = \frac{C_{CW}}{T - \theta} \quad (\text{S2})$$

$$\chi_m = \frac{C_{CW}}{T - \theta} c - 9 \times 10^{-6} \quad (\text{S3})$$

In eqns (S1, S3), we neglected the contribution of the magnetic properties of gasses dissolved in the suspending medium. For example, air-saturated water at room temperature contains up to 0.3 mM of dissolved  $\text{O}_2$  gas ( $\chi_{\text{O}_2}^{\text{molar}} = 3449 \times 10^{-6}$ )<sup>1,11</sup> — the contribution of  $\text{O}_2$  to

the magnetic susceptibility of the medium is  $\chi_{O_2} = 1.3 \times 10^{-8}$ , which is at least three orders of magnitude less than typical values of  $\chi_m$ .

### ***Density of the Paramagnetic Solution, $\rho_m$***

The dependence of density of the medium  $\rho_m$  on the concentration of paramagnetic salt in solution and on temperature of the solution is given by eqn. (S4), where  $T$  is expressed in °C,  $\rho_w(T)$  is the density of pure water ( $W_0 = 999.65$ ,  $W_1 = 2.0438 \times 10^{-1}$ ,  $W_2 = -6.1744 \times 10^{-2}$ ), and  $A$ – $F$  are empirical, dimensional parameters specific to the paramagnetic salt (for  $\text{GdCl}_3$ :  $A = 2.538 \times 10^2$ ,  $B = -1.149 \times 10^{-1}$ ,  $C = 1.386 \times 10^{-3}$ ,  $D = -1.306 \times 10^{-1}$ ,  $E = 0$ , and  $F = 0$ ; for  $\text{MnCl}_2$ :  $A = 1.022 \times 10^2$ ,  $B = 4.966 \times 10^{-1}$ ,  $C = -1.307 \times 10^{-2}$ ,  $D = -3.659 \times 10^{-0}$ ,  $E = -1.631 \times 10^{-1}$ , and  $F = 4.774 \times 10^{-3}$ )<sup>12</sup>.

$$\begin{aligned} \rho_m(T, c) &= \rho_w(T) + Ac + BcT + CcT^2 + Dc^{3/2} + Ec^{3/2}T + Fc^{3/2}T^2 = \\ &= W_0 + W_1T + W_2T^{3/2} + Ac + BcT + CcT^2 + Dc^{3/2} + Ec^{3/2}T + Fc^{3/2}T^2 \end{aligned} \quad (\text{S4})$$

### ***Magnetic Susceptibility of the Sample, $\chi_s$***

The typical values of  $\chi_s$  for diamagnetic substances are temperature-independent, small (about  $-1 \times 10^{-6}$ ... $-10 \times 10^{-6}$ ) and vary little from substance to substance (see **Fig. S2** for typical values of magnetic susceptibilities of common substances).<sup>1, 2, 9</sup> We neglected these differences in calculations of densities based on the empirical estimates of  $\alpha$  and  $\beta$  (eqn 8) from the calibration curves. For the measurements of density via the direct application of eqn (8), we set  $\chi_s = -5 \times 10^{-6}$  (in the middle of the typical range of values of  $\chi_s$  for most diamagnetic substances, **Fig. S2**) and estimated the accuracy of this assumption as  $\delta\chi_s = 10^{-5}$  (unitless).

This type of oversimplification and the estimation of uncertainty may not be general for all cases, especially when strongly diamagnetic ( $|\chi_s| \gg 10^{-5}$ ) or slightly paramagnetic samples are levitated. In such cases, either an accurate value of  $\chi_s$  should be used when calculating densities of eqn (8) or a larger margin of error assumed for this type of density measurement.<sup>13</sup>

### ***Levitation Height, $h$***

We measured the levitation heights of objects  $h$  using a ruler—we estimate the precision of this measurement to be  $\pm 0.5$  mm.

## Error Analysis

To estimate the error of our measurements of density using the calibration curves, we assume that we know parameters  $\alpha$  and  $\beta$  in eqn (8) exactly, and consider  $\rho_s$  to be a function of only one variable  $h$ ; we use eqn. (S5) to propagate the uncertainty in  $h$  for these types of measurements.<sup>8</sup> In eqn (S5),  $\alpha$  is the calibration parameter from eqn (8) and  $\delta h$  is  $\pm 0.5$  mm.

$$\delta\rho_s = \left| \frac{d\rho_s}{dh} \right| \delta h = \alpha \delta h \quad (\text{S5})$$

To estimate the error associated with the direct use of eqn (8) for measuring the density, we treat  $\rho_s$  as a function of several independent variables:  $B_0$ ,  $d$ ,  $\chi_s$ ,  $T$ ,  $c$ , and  $h$ , each of which is a source of independent random error (eqn. S6).<sup>8</sup> (Notice that  $\rho_m$  and  $\chi_m$  are not independent parameters – they are calculated from  $T$  and  $c$  using eqns (S4) and (S3), respectively.)

$$\delta\rho_s = \sqrt{\left( \frac{\partial\rho_s}{\partial T} \delta T \right)^2 + \left( \frac{\partial\rho_s}{\partial c} \delta c \right)^2 + \left( \frac{\partial\rho_s}{\partial \chi_s} \delta \chi_s \right)^2 + \left( \frac{\partial\rho_s}{\partial h} \delta h \right)^2 + \left( \frac{\partial\rho_s}{\partial d} \delta d \right)^2 + \left( \frac{\partial\rho_s}{\partial B_0} \delta B_0 \right)^2} \quad (\text{S6})$$

Eqn. (S7) summarizes eqn. (8) and eqns (S3) and (S4) in a form convenient for calculating the partial derivatives in eqn. (S6).

$$\rho_s = \left( \frac{4(\chi_s - \chi_m)B_0^2}{g\mu_o d^2} \right) h + \left( \rho_m - \frac{2(\chi_s - \chi_m)B_0^2}{g\mu_o d} \right), \quad (\text{S7})$$

where:

$$\rho_m(T, c) = W_0 + W_1 T + W_2 T^{3/2} + A c + B c T + C c T^2 + D c^{3/2} + E c^{3/2} T + F c^{3/2} T^2$$

$$\chi_m = \frac{C_{CW}}{T - \theta} c - 9 \times 10^{-6}$$

The partial derivatives of  $\rho_m$  and  $\chi_m$  with respect to  $T$  and  $c$  are needed for estimating eqn. (S6) and are given below (eqns S8A-B).

$$\frac{\partial \chi_m}{\partial T} = -C_{CW}c(T-\theta)^{-2} \quad (S8A)$$

$$\frac{\partial \rho_m}{\partial T} = W_1 + \frac{3}{2}W_2T^{1/2} + Bc + 2CcT + Ec^{3/2} + 2Fc^{3/2}T$$

$$\frac{\partial \chi_m}{\partial c} = \frac{C_{CW}}{T-\theta} \quad (S8B)$$

$$\frac{\partial \rho_m}{\partial c} = A + BT + CT^2 + \frac{3}{2}Dc^{1/2} + \frac{3}{2}ETc^{1/2} + \frac{3}{2}FT^2c^{1/2}$$

The partial derivatives of  $\rho_s$  with respect to  $B_0$ ,  $d$ ,  $\chi_s$ ,  $T$ ,  $c$ , and  $h$  are given by eqns (S9A-F) below.

$$\frac{\partial \rho_s}{\partial T} = -\frac{4B_0^2}{g\mu_o d^2} \left( h - \frac{d}{2} \right) \frac{\partial \chi_m}{\partial T} + \frac{\partial \rho_m}{\partial T},$$

where:

$$\frac{\partial \chi_m}{\partial T} = -C_{CW}c(T-\theta)^{-2} \quad (S9A)$$

$$\frac{\partial \rho_m}{\partial T} = W_1 + \frac{3}{2}W_2T^{1/2} + Bc + 2CcT + Ec^{3/2} + 2Fc^{3/2}T$$

$$\frac{\partial \rho_s}{\partial c} = -\frac{4B_0^2}{g\mu_o d^2} \left( h - \frac{d}{2} \right) \frac{\partial \chi_m}{\partial c} + \frac{\partial \rho_m}{\partial c},$$

where:

$$\frac{\partial \chi_m}{\partial c} = \frac{C_{CW}}{T-\theta} \quad (S9B)$$

$$\frac{\partial \rho_m}{\partial c} = A + BT + CT^2 + \frac{3}{2}Dc^{1/2} + \frac{3}{2}ETc^{1/2} + \frac{3}{2}FT^2c^{1/2}$$

$$\frac{\partial \rho_s}{\partial \chi_s} = \frac{4B_0^2}{g\mu_o d^2} \left( h - \frac{d}{2} \right) \quad (S9C)$$

$$\frac{\partial \rho_s}{\partial h} = \frac{4(\chi_s - \chi_m)B_0^2}{g\mu_o d^2} \quad (S9D)$$

$$\frac{\partial \rho_s}{\partial d} = \frac{2(\chi_s - \chi_m)B_0^2}{g\mu_o} (d^{-2} - 4hd^{-3}) \quad (S9E)$$

$$\frac{\partial \rho_s}{\partial B_0} = \frac{8(\chi_s - \chi_m)}{g \mu_o d^2} \left( h - \frac{d}{2} \right) B_0 \quad (\text{S9F})$$

Finally, to estimate the error  $\delta \rho_s$  in the measurement of density of the sample  $\rho_s$  one needs to substitute the expressions for the partial derivatives (eqns. S9A-F) into eqn. (S6) and evaluate the resulting expression using the values of parameters  $B_0$ ,  $d$ ,  $\chi_s$ ,  $T$ ,  $c$ , and  $h$ , and the tolerances of these parameters  $\delta B_0 = \pm 0.003$  (T),  $\delta d = \pm 0.5 \times 10^{-3}$  (m),  $\delta \chi_s = \pm 10^{-5}$  (unitless),  $\delta T = 1$  ( $^{\circ}\text{K}$ ),  $\delta c = \pm 0.002$  (M), and  $\delta h = \pm 0.5 \times 10^{-3}$  (m), respectively. We provide two examples of successful application of this procedure below.

#### **Dependence of $\delta \rho_s$ on $\delta T$ .**

We use eqn. (S6) (and eqns. (S9A-F)) to compare the effect of the uncertainty in temperature ( $\pm 1$   $^{\circ}\text{C}$  vs.  $\pm 10$   $^{\circ}\text{C}$ ) on the accuracy of the measurement of density of polystyrene spheres levitating in 350 mM solution of  $\text{MnCl}_2$ . This type of estimate may be appropriate for a user in a remote location with no immediate access to a thermometer for measuring temperature. For simplicity, we assume that all temperature-independent parameters and the value of  $B_0$  are known *exactly*. **Table S1** summarizes the parameters used for and the result of this estimation.

#### **Dependence of $\delta \rho_s$ on $\delta B_0$ .**

Similarly, we use eqn. (S6) (and eqns. (S9A-F)) to compare the effect of  $\delta B_0 = \pm 0.003$  T (typical accuracy established by using a magnetometer) vs.  $\delta B_0 = 0.1$  T (a safe assumption for variation between NdFeB magnets supplied by various manufacturers) on the accuracy of the density measurement of polystyrene spheres levitating in 350 mM  $\text{MnCl}_2$ . For simplicity, we

assume that all parameters except  $\delta B_0$  are known exactly. **Table S2** summarizes the parameters used for and the result of this estimation – while the uncertainty in the measurement of density increases significantly from  $\pm 0.0002$  to  $0.008 \text{ g/cm}^3$ , the measurement of density is still fairly accurate and may be useful in less demanding situations.



**Table S0.** Densities common plastics and organic liquids that can be used as density standards in magnetic levitation.

| sample                                       | density (g/cm <sup>3</sup> ) |
|----------------------------------------------|------------------------------|
| <b>organic polymers</b>                      |                              |
| high-density polyethylene                    | 0.97                         |
| polydimethylsiloxane (PDMS)                  | 1.04                         |
| polystyrene                                  | 1.05                         |
| poly(styrene- <i>co</i> -acrylonitrile)      | 1.08                         |
| poly(styrene- <i>co</i> -methylmethacrylate) | 1.14                         |
| nylon 6/6                                    | 1.14                         |
| polymethylmethacrylate                       | 1.18                         |
| polycarbonate                                | 1.22                         |
| neoprene rubber                              | 1.23                         |
| polyethylene terephthalate (mylar)           | 1.40                         |
| polyvinylchloride (PVC)                      | 1.40                         |
| cellulose acetate                            | 1.42                         |
| polyoxymethylene (delrin)                    | 1.43                         |
| polyvinyledene chloride                      | 1.70                         |
| polytetrafluoroethylene (Teflon)             | 2.20                         |
| <b>organic liquids</b>                       |                              |
| 3-fluorotoluene                              | 0.997                        |
| 2-fluorotoluene                              | 1.004                        |
| fluorobenzene                                | 1.025                        |
| 3-chlorotoluene                              | 1.072                        |
| chlorobenzene                                | 1.107                        |
| 2,4-difluorotoluene                          | 1.120                        |
| 2-nitrotoluene                               | 1.163                        |
| nitrobenzene                                 | 1.196                        |
| 1-chloro-2-fluorobenzene                     | 1.244                        |
| 1,3-dichlorobenzene                          | 1.288                        |
| 1,2-dichlorobenzene                          | 1.305                        |
| dichloromethane                              | 1.325                        |
| 3-bromotoluene                               | 1.410                        |
| bromobenzene                                 | 1.491                        |
| chloroform                                   | 1.492                        |
| 1-bromo-4-fluorobenzene                      | 1.593                        |
| hexafluorobenzene                            | 1.612                        |
| carbon tetrachloride                         | 1.630                        |
| tetradecafluorohexane                        | 1.669                        |
| 2,5-dibromotoluene                           | 1.895                        |
| perfluoro(methyldecalin)                     | 1.950                        |
| iodomethane                                  | 2.280                        |
| tribromomethane                              | 2.890                        |

**Table S1.** Dependence of uncertainty in measurement of density  $\delta\rho_s$  on uncertainty in  $\delta T$ .

| Parameter $P$                  | Description                                               | Magnitude of $P$                        | $\delta P$                     | $\delta P$                     |
|--------------------------------|-----------------------------------------------------------|-----------------------------------------|--------------------------------|--------------------------------|
| <b>experimental parameters</b> |                                                           |                                         |                                |                                |
| $B_0$                          | strength of magnetic field at the surface of the magnet   | 0.375 T                                 | known exactly                  | known exactly                  |
| $d$                            | distance between magnets                                  | 45 mm                                   | known exactly                  | known exactly                  |
| $T$                            | Temperature                                               | 23 °C                                   | $\pm 1$ °C                     | $\pm 10$ °C                    |
| $c$                            | Concentration of MnCl <sub>2</sub>                        | 0.350 M                                 | known exactly                  | known exactly                  |
| <b>Unknowns</b>                |                                                           |                                         |                                |                                |
| $\chi_s$                       | bulk magnetic susceptibility of the sample                | $-5 \times 10^{-6}$ (SI, unitless)      | known exactly                  | known exactly                  |
| <b>calculated parameters</b>   |                                                           |                                         |                                |                                |
| $\rho_m(c, T)$                 | density of paramagnetic medium                            | 1.0339 g/cm <sup>3</sup>                | $\pm 0.0003$ g/cm <sup>3</sup> | $\pm 0.0026$ g/cm <sup>3</sup> |
| $\chi_m(c, T)$                 | bulk magnetic susceptibility of the medium                | $\pm 56 \times 10^{-6}$                 | known exactly                  | known exactly                  |
| <b>constants</b>               |                                                           |                                         |                                |                                |
| $g$                            | acceleration due to gravity                               | 9.80 m/s <sup>2</sup>                   | n/a                            | n/a                            |
| $\mu_0$                        | permeability of free space                                | $4\pi \times 10^{-6}$ N·A <sup>-2</sup> | n/a                            | n/a                            |
| <b>independent variable</b>    |                                                           |                                         |                                |                                |
| $h$                            | “levitation height” of the sample above the bottom magnet | 12.0 mm                                 | known exactly                  | known exactly                  |
| <b>dependent variable</b>      |                                                           |                                         |                                |                                |
| $\rho_s$                       | density of sample                                         | 1.0483 g/cm <sup>3</sup>                | $\pm 0.0003$ g/cm <sup>3</sup> | $\pm 0.003$ g/cm <sup>3</sup>  |

**Table S2.** Dependence of uncertainty in measurement  $\delta\rho_s$  on uncertainty in  $\delta B_0$ .

| Parameter $P$                  | Description                                               | Magnitude of $P$                        | $\delta P$                     | $\delta P$                    |
|--------------------------------|-----------------------------------------------------------|-----------------------------------------|--------------------------------|-------------------------------|
| <b>experimental parameters</b> |                                                           |                                         |                                |                               |
| $B_0$                          | strength of magnetic field at the surface of the magnet   | 0.375 T                                 | $\pm 0.003$ T                  | $\pm 0.1$ T                   |
| $d$                            | distance between magnets                                  | 45 mm                                   | known exactly                  | known exactly                 |
| $T$                            | Temperature                                               | 23 °C                                   | known exactly                  | known exactly                 |
| $c$                            | concentration of MnCl <sub>2</sub>                        | 0.350 M                                 | known exactly                  | known exactly                 |
| <b>Unknowns</b>                |                                                           |                                         |                                |                               |
| $\chi_s$                       | bulk magnetic susceptibility of the sample                | $-5 \times 10^{-6}$ (SI, unitless)      | known exactly                  | known exactly                 |
| <b>calculated parameters</b>   |                                                           |                                         |                                |                               |
| $\rho_m(c, T)$                 | density of paramagnetic medium                            | 1.0339 g/cm <sup>3</sup>                | known exactly                  | known exactly                 |
| $\chi_m(c, T)$                 | bulk magnetic susceptibility of the medium                | $\pm 56 \times 10^{-6}$                 | known exactly                  | known exactly                 |
| <b>constants</b>               |                                                           |                                         |                                |                               |
| $g$                            | acceleration due to gravity                               | 9.80 m/s <sup>2</sup>                   | n/a                            | n/a                           |
| $\mu_0$                        | permeability of free space                                | $4\pi \times 10^{-6}$ N·A <sup>-2</sup> | n/a                            | n/a                           |
| <b>independent variable</b>    |                                                           |                                         |                                |                               |
| $h$                            | “levitation height” of the sample above the bottom magnet | 12.0 mm                                 | known exactly                  | known exactly                 |
| <b>dependent variable</b>      |                                                           |                                         |                                |                               |
| $\rho_s$                       | density of sample                                         | 1.0483 g/cm <sup>3</sup>                | $\pm 0.0002$ g/cm <sup>3</sup> | $\pm 0.008$ g/cm <sup>3</sup> |

**Table S3.** Linear correlations for  $h$  and  $\rho_s$  at different concentrations of  $\text{MnCl}_2$  obtained from the plot of these two parameters in **Fig. 5A**.

| concentration of $\text{MnCl}_2(\text{M})$ | linear least squares fit to Fig. 5A | least squares linear fit in the form of Eqn 8 | $\alpha$ | $\beta$ |
|--------------------------------------------|-------------------------------------|-----------------------------------------------|----------|---------|
| 0.1                                        | $h = -3664\rho_s + 3717$            | $\rho_s = -0.0003h + 1.0145$                  | -0.0003  | 1.0145  |
| 0.5                                        | $h = -449\rho_s + 493$              | $\rho_s = -0.002h + 1.098$                    | -0.002   | 1.098   |
| 1.0                                        | $h = -247\rho_s + 294$              | $\rho_s = -0.004h + 1.190$                    | -0.004   | 1.190   |
| 1.5                                        | $h = -160\rho_s + 206$              | $\rho_s = -0.006h + 1.287$                    | -0.006   | 1.287   |
| 2.0                                        | $h = -117\rho_s + 162$              | $\rho_s = -0.008h + 1.385$                    | -0.008   | 1.385   |
| 2.5                                        | $h = -93.4\rho_s + 138$             | $\rho_s = -0.011h + 1.478$                    | -0.011   | 1.478   |
| 3.0                                        | $h = -80.8\rho_s + 126$             | $\rho_s = -0.012h + 1.559$                    | -0.012   | 1.559   |

**Figure S6.** Dependence of  $\alpha$  and  $\beta$  on  $[\text{MnCl}_2]$ . A) Plot correlating  $\alpha$  with  $[\text{MnCl}_2]$ ; least squares linear fit:  $y = 0.0041x - 0.0001$ ,  $R^2 = 0.997$ . B) Plot correlating  $\beta$  with  $[\text{MnCl}_2]$ ; least squares linear fit:  $y = 0.1889x + 1.0014$ ,  $R^2 = 0.999$ .

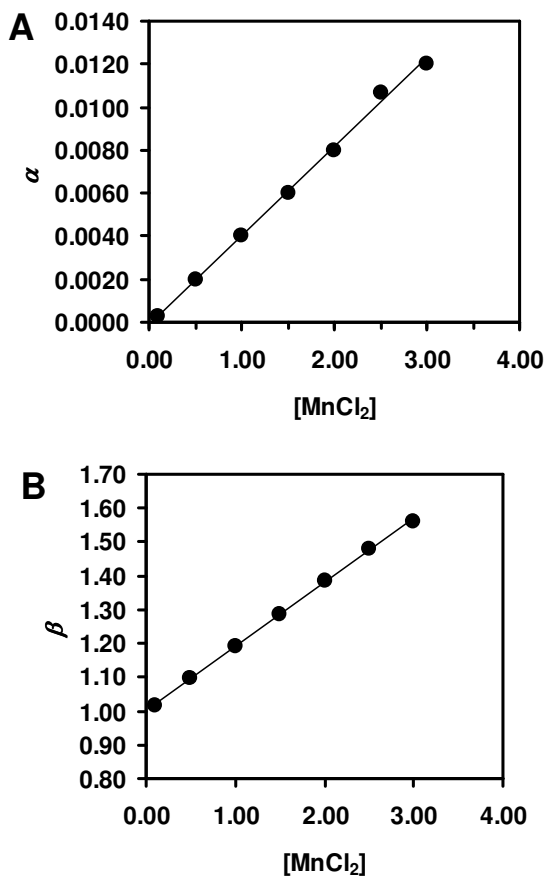

**Table S4.** Details of experimental parameters used for obtaining densities of solids using calibration curves in  $\text{MnCl}_2$ . Table 2 compares the calculated densities from Tables S3-S5.

| Sample                                       | $[\text{MnCl}_2]$<br>(mol/L) | $h$<br>(mm)    | calibration curve used   | Calculated $\rho_s$<br>( $\text{g/cm}^3$ ) |
|----------------------------------------------|------------------------------|----------------|--------------------------|--------------------------------------------|
| <b>glass beads</b>                           |                              |                |                          |                                            |
| $\rho = 1.0100 \text{ g/cm}^3$               | 0.100                        | $16.7 \pm 0.5$ | $h = -3664\rho_s + 3717$ | $1.0099 \pm 0.0002$                        |
| $\rho = 1.1000 \text{ g/cm}^3$               | 1.000                        | $22.0 \pm 0.5$ | $h = -247\rho_s + 294$   | $1.101 \pm 0.002$                          |
| $\rho = 1.1500 \text{ g/cm}^3$               | 1.500                        | $21.9 \pm 0.5$ | $h = -160\rho_s + 206$   | $1.152 \pm 0.003$                          |
| <b>spherical polymers</b>                    |                              |                |                          |                                            |
| polystyrene                                  | 0.500                        | $23.5 \pm 0.5$ | $h = -449\rho_s + 493$   | $1.047 \pm 0.001$                          |
| nylon 6/6                                    | 1.000                        | $13.5 \pm 0.5$ | $h = -247\rho_s + 294$   | $1.137 \pm 0.002$                          |
| polymethylmethacrylate                       | 2.000                        | $23.3 \pm 0.5$ | $h = -117\rho_s + 162$   | $1.186 \pm 0.004$                          |
| <b>irregularly-shaped polymers</b>           |                              |                |                          |                                            |
| polystyrene                                  | 0.500                        | $22.0 \pm 0.5$ | $h = -449\rho_s + 493$   | $1.049 \pm 0.001$                          |
| poly(styrene- <i>co</i> -acrylonitrile)      | 1.000                        | $28.1 \pm 0.5$ | $h = -247\rho_s + 294$   | $1.076 \pm 0.002$                          |
| poly(styrene- <i>co</i> -methylmethacrylate) | 1.000                        | $14.0 \pm 0.5$ | $h = -247\rho_s + 294$   | $1.133 \pm 0.002$                          |
| <b>organic droplets</b>                      |                              |                |                          |                                            |
| chlorobenzene                                | 1.000                        | $18.5 \pm 0.5$ | $h = -247\rho_s + 294$   | $1.115 \pm 0.003$                          |
| 2-nitrotoluene                               | 1.000                        | $5.2 \pm 0.5$  | $h = -247\rho_s + 294$   | $1.169 \pm 0.003$                          |
| dichloromethane                              | 3.000                        | $19.5 \pm 0.5$ | $h = -80.8\rho_s + 126$  | $1.324 \pm 0.006$                          |
| 3-bromotoluene                               | 3.000                        | $12.5 \pm 0.5$ | $h = -80.8\rho_s + 126$  | $1.405 \pm 0.006$                          |
| chloroform                                   | 3.000                        | $6.5 \pm 0.5$  | $h = -80.8\rho_s + 126$  | $1.479 \pm 0.007$                          |

**Table S5.** Details of experimental parameters used for obtaining densities of solids using eqn (8) in  $\text{MnCl}_2$ . Table 2 compares the calculated densities from Tables S3-S5.

| Sample                                       | $[\text{MnCl}_2]$<br>(mol/L) | Density of<br>$\text{MnCl}_2$<br>solution<br>( $\text{g/cm}^3$ ) | $\chi_m$<br>(unitless) | $h$<br>(mm)    | Calculated $\rho_s$<br>( $\text{g/cm}^3$ ) |
|----------------------------------------------|------------------------------|------------------------------------------------------------------|------------------------|----------------|--------------------------------------------|
| <b>glass beads</b>                           |                              |                                                                  |                        |                |                                            |
| $\rho = 1.0100 \text{ g/cm}^3$               | 0.100                        | 1.0081                                                           | $10 \times 10^{-6}$    | $16.7 \pm 0.5$ | $1.010 \pm 0.001$                          |
| $\rho = 1.1000 \text{ g/cm}^3$               | 1.000                        | 1.0994                                                           | $177 \times 10^{-6}$   | $22.0 \pm 0.5$ | $1.101 \pm 0.002$                          |
| $\rho = 1.1500 \text{ g/cm}^3$               | 1.500                        | 1.1486                                                           | $270 \times 10^{-6}$   | $21.9 \pm 0.5$ | $1.152 \pm 0.003$                          |
| <b>spherical polymers</b>                    |                              |                                                                  |                        |                |                                            |
| polystyrene                                  | 0.500                        | 1.0492                                                           | $84 \times 10^{-6}$    | $23.5 \pm 0.5$ | $1.047 \pm 0.001$                          |
| nylon 6/6                                    | 1.000                        | 1.0994                                                           | $177 \times 10^{-6}$   | $13.5 \pm 0.5$ | $1.134 \pm 0.003$                          |
| polymethylmethacrylate                       | 2.000                        | 1.1971                                                           | $363 \times 10^{-6}$   | $23.3 \pm 0.5$ | $1.191 \pm 0.005$                          |
| <b>irregularly-shaped polymers</b>           |                              |                                                                  |                        |                |                                            |
| polystyrene                                  | 0.500                        | 1.0492                                                           | $84 \times 10^{-6}$    | $22.0 \pm 0.5$ | $1.050 \pm 0.001$                          |
| poly(styrene- <i>co</i> -acrylonitrile)      | 1.000                        | 1.0994                                                           | $177 \times 10^{-6}$   | $28.1 \pm 0.5$ | $1.078 \pm 0.003$                          |
| poly(styrene- <i>co</i> -methylmethacrylate) | 1.000                        | 1.0994                                                           | $177 \times 10^{-6}$   | $14.0 \pm 0.5$ | $1.132 \pm 0.003$                          |
| <b>organic droplets</b>                      |                              |                                                                  |                        |                |                                            |
| chlorobenzene                                | 1.000                        | 1.0994                                                           | $177 \times 10^{-6}$   | $18.5 \pm 0.5$ | $1.115 \pm 0.002$                          |
| 2-nitrotoluene                               | 1.000                        | 1.0994                                                           | $177 \times 10^{-6}$   | $5.2 \pm 0.5$  | $1.166 \pm 0.005$                          |
| dichloromethane                              | 3.000                        | 1.2923                                                           | $548 \times 10^{-6}$   | $19.5 \pm 0.5$ | $1.329 \pm 0.007$                          |
| 3-bromotoluene                               | 3.000                        | 1.2923                                                           | $548 \times 10^{-6}$   | $12.5 \pm 0.5$ | $1.416 \pm 0.007$                          |
| chloroform                                   | 3.000                        | 1.2923                                                           | $548 \times 10^{-6}$   | $6.5 \pm 0.5$  | $1.488 \pm 0.008$                          |

**Table S6.** Details of experimental parameters used for obtaining densities of solids using eqn (8) in GdCl<sub>3</sub>. Table 2 compares the calculated densities from Tables S3-S5.

| Sample                                           | [GdCl <sub>3</sub> ]<br>(mol/L) | Density of<br>GdCl <sub>3</sub><br>solution<br>(g/cm <sup>3</sup> ) | $\chi_m$<br>(unitless) | $h$<br>(mm)    | Calculated $\rho_s$<br>(g/cm <sup>3</sup> ) |
|--------------------------------------------------|---------------------------------|---------------------------------------------------------------------|------------------------|----------------|---------------------------------------------|
| <b>glass beads</b>                               |                                 |                                                                     |                        |                |                                             |
| $\rho = 1.0100 \text{ g/cm}^3$                   | 0.050                           | 1.0100                                                              | $8 \times 10^{-6}$     | $26.0 \pm 0.5$ | $1.009 \pm 0.001$                           |
| $\rho = 1.1000 \text{ g/cm}^3$                   | 0.400                           | 1.0950                                                              | $125 \times 10^{-6}$   | $20.2 \pm 0.5$ | $1.102 \pm 0.002$                           |
| $\rho = 1.1500 \text{ g/cm}^3$                   | 0.600                           | 1.1426                                                              | $192 \times 10^{-6}$   | $20.5 \pm 0.5$ | $1.152 \pm 0.003$                           |
| <b>spherical polymers</b>                        |                                 |                                                                     |                        |                |                                             |
| polystyrene                                      | 0.200                           | 1.0468                                                              | $58 \times 10^{-6}$    | $22.8 \pm 0.5$ | $1.046 \pm 0.001$                           |
| nylon 6/6                                        | 0.400                           | 1.0950                                                              | $125 \times 10^{-6}$   | $8.6 \pm 0.5$  | $1.136 \pm 0.004$                           |
| polymethylmethacrylate                           | 0.750                           | 1.1780                                                              | $242 \times 10^{-6}$   | $21.3 \pm 0.5$ | $1.185 \pm 0.003$                           |
| <b>irregularly-shaped<br/>polymers</b>           |                                 |                                                                     |                        |                |                                             |
| polystyrene                                      | 0.140                           | 1.0321                                                              | $38 \times 10^{-6}$    | $8.5 \pm 0.5$  | $1.045 \pm 0.003$                           |
| poly(styrene- <i>co</i> -<br>acrylonitrile)      | 0.250                           | 1.0589                                                              | $75 \times 10^{-6}$    | $12.7 \pm 0.5$ | $1.076 \pm 0.003$                           |
| poly(styrene- <i>co</i> -<br>methylmethacrylate) | 0.530                           | 1.1260                                                              | $168 \times 10^{-6}$   | $20.9 \pm 0.5$ | $1.132 \pm 0.002$                           |
| <b>organic droplets</b>                          |                                 |                                                                     |                        |                |                                             |
| chlorobenzene                                    | 0.500                           | 1.1189                                                              | $158 \times 10^{-6}$   | $27.7 \pm 0.5$ | $1.100 \pm 0.003$                           |
| 2-nitrotoluene                                   | 0.500                           | 1.1189                                                              | $158 \times 10^{-6}$   | $12.2 \pm 0.5$ | $1.157 \pm 0.003$                           |
| dichloromethane                                  | 1.500                           | 1.3514                                                              | $493 \times 10^{-6}$   | $26.2 \pm 0.5$ | $1.300 \pm 0.007$                           |
| 3-bromotoluene                                   | 1.500                           | 1.3514                                                              | $493 \times 10^{-6}$   | $17.8 \pm 0.5$ | $1.404 \pm 0.006$                           |
| chloroform                                       | 1.500                           | 1.3514                                                              | $493 \times 10^{-6}$   | $11.8 \pm 0.5$ | $1.471 \pm 0.006$                           |

**Figure S7.** Plots showing the dependence of error in  $\rho_s$  on various experimental parameters at constant temperature. A) Dependence of  $\delta\rho_s$  on  $[\text{MnCl}_2]$  in water at 23 °C. Dependence of  $\delta\rho_s$  on  $h$  over the entire vertical distance between the magnets (45mm) at B) 0.1 M  $\text{MnCl}_2$  and C) 5.0 M  $\text{MnCl}_2$  at 23 °C.

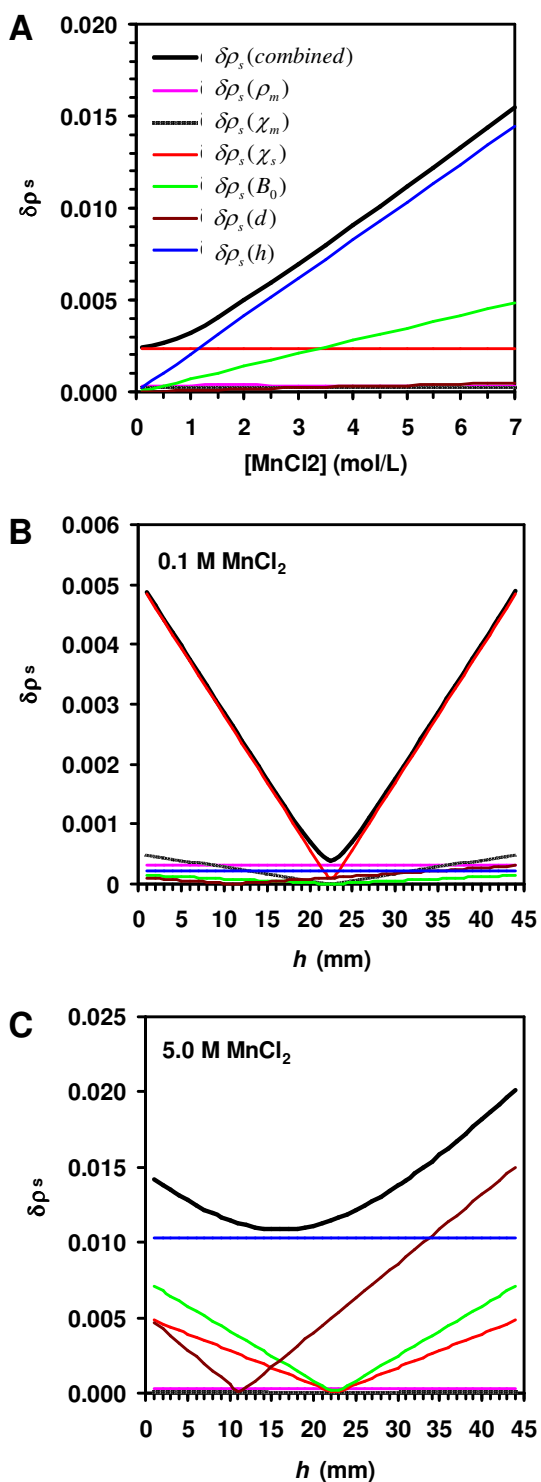



## References:

- (1) Lide, D. R., Ed. *CRC Handbook of Chemistry and Physics*, 89<sup>th</sup> ed. [Online]; CRC Press: Boca Raton, FL, 2008.
- (2) Du Tremolet de Lacheisserie, E., Gignoux, D., Schlenker, M., Eds. *Magnetism*; Kluwer Academic Publishers: Norwell, MA, 2002.
- (3) Hirota, N.; Kurashige, M.; Iwasaka, M.; Ikehata, M.; Uetake, H.; Takayama, T.; Nakamura, H.; Ikezoe, Y.; Ueno, S.; Kitazawa, K. *Physica B* **2004**, *346*, 267-271.
- (4) Ikezoe, Y.; Kaihatsu, T.; Sakae, S.; Uetake, H.; Hirota, N.; Kitazawa, K. *Energy Conv. Manag.* **2002**, *43*, 417-425.
- (5) Kang, J. H.; Choi, S.; Lee, W.; Park, J. K. *J. Am. Chem. Soc.* **2008**, *130*, 396-397.
- (6) Kuchel, P. W.; Chapman, B. E.; Bubb, W. A.; Hansen, P. E.; Durrant, C. J.; Hertzberg, M. P. *Concepts in Magn. Reson.* **2003**, *18A*, 56-71.
- (7) Simon, M. D.; Geim, A. K. *J. Appl. Phys.* **2000**, *87*, 6200-6204.
- (8) Taylor, J. R. *An Introduction to Error Analysis*; University Science Books: Sausalito, CA, 1997.
- (9) Andres, U. *Magnetohydrodynamic & Magnetohydrostatic Methods of Mineral Separation*; John Wiley & Sons: New York, NY, 1976.
- (10) Hatscher, S.; Schilder, H.; Lueken, H.; Urland, W. *Pure Appl. Chem.* **2005**, *77*, 497-511.
- (11) Weiss, R. F. *Deep-Sea Research* **1970**, *17*, 721-735.
- (12) Sohnel, O.; Novotny, P. *Densities of Aqueous Solutions of Inorganic Substances*; Elsevier: New York, NY, 1985.
- (13) Paramagnetic samples will also levitate in this device provided that  $\chi_m > \chi_s$ .
